# Supplementary material for: Association Between Exposure to Outdoor Artificial Light at Night and Sleep Disorders Among Children in China
Source: PubMed Central journal article supplement (PMC9123501; doi:10.1001/jamanetworkopen.2022.13247), 2022-05-20

## Supplementary Online Content

Wang LB, Gong YC, Fang QL, et al. Association between exposure to outdoor artificial light at night and sleep disorders among children in China. *JAMA Netw Open*. 2022;5(5):e2213247. doi:10.1001/jamanetworkopen.2022.13247

**eTable 1.** Details of All Districts

**eTable 2.** Distribution of Outdoor Artificial Light at Night

**eTable 3.** Associations Between Quintiles of Outdoor ALAN With Sleep Disorder Score and Odds of Sleep Disorder in Children Adjusted for Additional Variables of Passive Smoking and Breastfeeding (N = 201 994)

**eTable 4.** Associations Between Quintiles of Outdoor ALAN With Sleep Disorder Score and Odds of Sleep Disorder in Children Excluding Children With Allergic Rhinitis (n = 175 539)

**eTable 5.** Associations Between Quintiles of Outdoor ALAN With Sleep Disorder Score and Odds of Sleep Disorder in Children Excluding Children With Asthma (n = 185 260)

**eFigure 1.** Flowchart of Study Design and Participant Selection

**eFigure 2.** Directed Acyclic Graph for the Association Between Outdoor Artificial Light at Night and Sleep Disorder Symptoms, Showing All Potential Covariates

This supplementary material has been provided by the authors to give readers additional information about their work.

**eTable 1. Details of All Districts**

| Province  | City      | District  | Population<br>(×10 000) | Area (km <sup>2</sup> ) | Population density<br>(persons/km <sup>2</sup> ) | GDP<br>(Yuan per capita) |
|-----------|-----------|-----------|-------------------------|-------------------------|--------------------------------------------------|--------------------------|
| Liaoning  | Shenyang  | Heping    | 70.4                    | 58.9                    | 11 952                                           | 99 754                   |
| Liaoning  | Shenyang  | Shenhe    | 84.4                    | 59.5                    | 14 185                                           | 101 141                  |
| Liaoning  | Shenyang  | Dadong    | 79.2                    | 100.1                   | 7912                                             | 82 692                   |
| Liaoning  | Shenyang  | Huanggu   | 94.6                    | 66.2                    | 14 290                                           | 46 399                   |
| Liaoning  | Shenyang  | Tiexi     | 115.9                   | 286.1                   | 4051                                             | 66 828                   |
| Liaoning  | Shenyang  | Zhanqian  | 30.1                    | 82.32                   | 3656                                             | 41 944                   |
| Liaoning  | Dalian    | Zhongshan | 36.05                   | 40                      | 8990                                             | 189 618                  |
| Liaoning  | Dalian    | Ganjingzi | 76.8                    | 492                     | 1911                                             | 115 893                  |
| Liaoning  | Dalian    | Shahekou  | 64.46                   | 35                      | 18 572                                           | 57 773                   |
| Liaoning  | Dalian    | Xigang    | 29.09                   | 24                      | 12 139                                           | 111 433                  |
| Liaoning  | Dalian    | Xishi     | 19.9                    | 314.9                   | 632                                              | 51 900                   |
| Liaoning  | Fushun    | Shuncheng | 43                      | 348                     | 1236                                             | 29 019                   |
| Liaoning  | Fushun    | Xinfu     | 29.9                    | 107.15                  | 2790                                             | 72 631                   |
| Liaoning  | Fushun    | Dongzhou  | 30.5                    | 604                     | 505                                              | 68 554                   |
| Liaoning  | Fushun    | Wanghua   | 30.06                   | 109.14                  | 2754                                             | 24 765                   |
| Liaoning  | Anshan    | Tiedong   | 54                      | 41.77                   | 12 928                                           | 87 780                   |
| Liaoning  | Anshan    | Tiexi     | 37.9                    | 29.89                   | 12 680                                           | 92 976                   |
| Liaoning  | Anshan    | Lishan    | 40.3                    | 48.41                   | 8325                                             | 78 331                   |
| Liaoning  | Benxi     | Pingshan  | 33                      | 179                     | 1844                                             | 54 548                   |
| Liaoning  | Benxi     | Mingshan  | 41.9                    | 413                     | 1015                                             | 27 947                   |
| Liaoning  | Benxi     | Xihu      | 7.2                     | 322                     | 224                                              | 89 092                   |
| Liaoning  | Dandong   | Zhenxing  | 49.8                    | 130.08                  | 3828                                             | 22 262                   |
| Liaoning  | Dandong   | Yuanbao   | 21.6                    | 91.6                    | 2358                                             | 30 437                   |
| Liaoning  | Dandong   | Zhenan    | 19                      | 651                     | 292                                              | 24 567                   |
| Liaoning  | Liaoyang  | Baita     | 36.8                    | 35                      | 10514                                            | 40 806                   |
| Liaoning  | Liaoyang  | Wensheng  | 12.7                    | 305                     | 416                                              | 30 289                   |
| Liaoning  | Liaoyang  | Laobian   | 11.8                    | 217                     | 544                                              | 141 553                  |
| Guangdong | Guangzhou | Liwan     | 95.00                   | 59.10                   | 16 074                                           | 122 028                  |
| Guangdong | Guangzhou | Yuexiu    | 116.38                  | 33.80                   | 34 432                                           | 271 050                  |
| Guangdong | Guangzhou | Haizhu    | 166.31                  | 90.40                   | 18 397                                           | 104 499                  |
| Guangdong | Guangzhou | Tianhe    | 169.79                  | 96.33                   | 17 626                                           | 252 407                  |
| Guangdong | Guangzhou | Huangpu   | 109.10                  | 484.17                  | 2253                                             | 297 179                  |
| Guangdong | Guangzhou | Panyu     | 171.93                  | 529.94                  | 3244                                             | 114 712                  |
| Guangdong | Guangzhou | Huadu     | 107.55                  | 970.04                  | 1109                                             | 119 937                  |
| Guangdong | Guangzhou | Nansha    | 72.50                   | 783.86                  | 925                                              | 190 169                  |
| Guangdong | Guangzhou | Conghua   | 64.21                   | 1974.50                 | 325                                              | 62 312                   |
| Guangdong | Shenzhen  | Luohu     | 102.72                  | 78.75                   | 13 044                                           | 210 446                  |
| Guangdong | Shenzhen  | Baoan     | 314.9                   | 396.61                  | 7940                                             | 109 659                  |
| Guangdong | Shenzhen  | Longgang  | 227.89                  | 388.22                  | 5870                                             | 169 869                  |
| Guangdong | Foshan    | Chancheng | 116.11                  | 153.91                  | 7544                                             | 150 082                  |
| Guangdong | Foshan    | Nanhai    | 278.75                  | 1071.55                 | 2601                                             | 97 035                   |
| Guangdong | Foshan    | Shunde    | 261.45                  | 806                     | 3244                                             | 116 914                  |
| Guangdong | Foshan    | Gaoming   | 44.02                   | 938                     | 469                                              | 193 028                  |
| Guangdong | Foshan    | Sanshui   | 65.34                   | 827.69                  | 789                                              | 177 843                  |
| Guangdong | Zhongshan | Shiqi     | 20.91                   | 22.72                   | 9203                                             | 115 804                  |
| Guangdong | Zhongshan | Dongqu    | 17.44                   | 71.4                    | 2443                                             | 153 084                  |
| Guangdong | Zhongshan | Xiaolan   | 33.32                   | 147.29                  | 2262                                             | 110 176                  |
| Guangdong | Zhongshan | Minzhong  | 11.31                   | 118.87                  | 952                                              | 72 001                   |
| Guangdong | Zhongshan | Nanlang   | 11.1                    | 218.86                  | 507                                              | 116 808                  |
| Guangdong | Zhongshan | Sanxiang  | 20.78                   | 93.68                   | 2219                                             | 87 739                   |
| Guangdong | Zhuhai    | Xiangzhou | 97.07                   | 553.31                  | 1754                                             | 150 476                  |
| Guangdong | Zhuhai    | Doumeng   | 43.89                   | 613.88                  | 715                                              | 70 249                   |
| Guangdong | Maoming   | Maonan    | 47.22                   | 486                     | 971                                              | 51 042                   |
| Guangdong | Maoming   | Dianbai   | 166.64                  | 2230                    | 747                                              | 34 863                   |
| Xinjiang  | Kashgar   | Kashgar   | 72.23                   | 1056.8                  | 683                                              | 22 406                   |

Abbreviation: GDP, gross domestic product.

**eTable 2. Distribution of Outdoor Artificial Light at Night Levels**

|                                   | <i>n</i> | Mean (SD)     | Median (IQR)  | P25   | P75   | Minimum | Maximum |
|-----------------------------------|----------|---------------|---------------|-------|-------|---------|---------|
| <b>Total</b>                      | 201 994  | 27.85 (16.39) | 25.89 (17.23) | 17.58 | 34.81 | 0.02    | 113.48  |
|                                   |          |               |               |       |       |         |         |
| <b>Province/Autonomous Region</b> |          |               |               |       |       |         |         |
| Liaoning                          | 59 754   | 32.96 (19.02) | 29.00 (24.06) | 20.19 | 44.25 | 2.33    | 87.60   |
| Guangdong                         | 131 412  | 23.83 (12.21) | 23.59 (15.15) | 15.53 | 30.68 | 0.02    | 113.48  |
| Xinjiang                          | 10 828   | 48.46 (21.00) | 53.21 (37.22) | 31.07 | 68.29 | 0.34    | 75.57   |
|                                   |          |               |               |       |       |         |         |
| <b>Gender</b>                     |          |               |               |       |       |         |         |
| Boys                              | 106 378  | 27.72 (16.31) | 25.89 (17.23) | 17.58 | 34.81 | 0.02    | 113.48  |
| Girls                             | 95 616   | 27.99 (16.49) | 25.89 (17.23) | 17.60 | 34.83 | 0.02    | 113.48  |

Note: the unit of artificial light at night, nanowatts per centimeter squared per steradian (nW/cm<sup>2</sup>/sr)

**eTable 3. Associations Between Quintiles of Outdoor ALAN With Sleep Disorder Score and Odds of Sleep Disorder in Children Adjusted for Additional Variables of Passive Smoking and Breastfeeding (N = 201 994)**

|                                    | Q1        | Q2                | Q3                 | Q4                 | Q5                  |
|------------------------------------|-----------|-------------------|--------------------|--------------------|---------------------|
| <b>β (95%CI) for outdoor ALAN</b>  |           |                   |                    |                    |                     |
| total sleep score <sup>a</sup>     |           |                   |                    |                    |                     |
| crude                              | Reference | 0.83 (0.69, 0.98) | 0.88 (0.74, 1.02)  | 0.74 (0.60, 0.88)  | 0.69 (0.53, 0.84)   |
| adjusted <sup>b</sup>              | Reference | 0.83 (0.68, 0.98) | 0.85 (0.70, 1.00)  | 0.65 (0.50, 0.81)  | 0.58 (0.41, 0.75)   |
| DIMS score <sup>a</sup>            |           |                   |                    |                    |                     |
| crude                              | Reference | 0.97 (0.83, 1.11) | 0.90 (0.77, 1.04)  | 0.91 (0.77, 1.05)  | 0.96 (0.81, 1.12)   |
| adjusted <sup>b</sup>              | Reference | 0.91 (0.76, 1.05) | 0.77 (0.63, 0.92)  | 0.76 (0.61, 0.91)  | 0.87 (0.70, 1.05)   |
| SBD score <sup>a</sup>             |           |                   |                    |                    |                     |
| crude                              | Reference | 0.56 (0.42, 0.70) | 0.86 (0.72, 1.00)  | 0.89 (0.75, 1.03)  | 0.84 (0.68, 1.00)   |
| adjusted <sup>b</sup>              | Reference | 0.42 (0.28, 0.57) | 0.63 (0.49, 0.78)  | 0.54 (0.39, 0.70)  | 0.37 (0.20, 0.54)   |
| DA score <sup>a</sup>              |           |                   |                    |                    |                     |
| crude                              | Reference | 0.16 (0.02, 0.30) | 0.06 (-0.08, 0.20) | 0.01 (-0.13, 0.15) | -0.08 (-0.23, 0.08) |
| adjusted <sup>b</sup>              | Reference | 0.29 (0.14, 0.43) | 0.25 (0.10, 0.40)  | 0.19 (0.03, 0.34)  | 0.12 (-0.05, 0.29)  |
| SWTD score <sup>a</sup>            |           |                   |                    |                    |                     |
| crude                              | Reference | 0.47 (0.33, 0.61) | 0.41 (0.27, 0.55)  | 0.20 (0.06, 0.34)  | 0.16 (0.00, 0.32)   |
| adjusted <sup>b</sup>              | Reference | 0.42 (0.27, 0.57) | 0.43 (0.29, 0.58)  | 0.20 (0.04, 0.35)  | 0.03 (-0.14, 0.20)  |
| DOES score <sup>a</sup>            |           |                   |                    |                    |                     |
| crude                              | Reference | 0.48 (0.34, 0.63) | 0.68 (0.54, 0.82)  | 0.57 (0.43, 0.72)  | 0.47 (0.31, 0.63)   |
| adjusted <sup>b</sup>              | Reference | 0.70 (0.55, 0.84) | 0.79 (0.64, 0.93)  | 0.60 (0.44, 0.75)  | 0.70 (0.53, 0.87)   |
| SHY score <sup>a</sup>             |           |                   |                    |                    |                     |
| crude                              | Reference | 0.62 (0.47, 0.76) | 0.55 (0.41, 0.69)  | 0.35 (0.21, 0.49)  | 0.32 (0.16, 0.48)   |
| adjusted <sup>b</sup>              | Reference | 0.43 (0.28, 0.57) | 0.48 (0.34, 0.62)  | 0.27 (0.12, 0.42)  | -0.01 (-0.18, 0.16) |
| <b>OR (95%CI) for outdoor ALAN</b> |           |                   |                    |                    |                     |
| Sleep disorder                     |           |                   |                    |                    |                     |
| crude                              | Reference | 1.23 (1.14, 1.33) | 1.30 (1.21, 1.41)  | 1.22 (1.13, 1.32)  | 1.14 (1.05, 1.25)   |
| adjusted <sup>b</sup>              | Reference | 1.34 (1.23, 1.45) | 1.43 (1.32, 1.56)  | 1.32 (1.21, 1.44)  | 1.25 (1.14, 1.38)   |
| DIMS                               |           |                   |                    |                    |                     |
| crude                              | Reference | 1.26 (1.18, 1.35) | 1.29 (1.21, 1.38)  | 1.26 (1.18, 1.35)  | 1.25 (1.16, 1.35)   |
| adjusted <sup>b</sup>              | Reference | 1.29 (1.21, 1.39) | 1.32 (1.23, 1.42)  | 1.28 (1.19, 1.37)  | 1.31 (1.21, 1.43)   |
| SBD                                |           |                   |                    |                    |                     |
| crude                              | Reference | 1.17 (1.09, 1.25) | 1.26 (1.18, 1.35)  | 1.29 (1.21, 1.38)  | 1.25 (1.16, 1.34)   |
| adjusted <sup>b</sup>              | Reference | 1.17 (1.09, 1.25) | 1.24 (1.15, 1.33)  | 1.21 (1.12, 1.30)  | 1.15 (1.06, 1.24)   |
| DA                                 |           |                   |                    |                    |                     |
| crude                              | Reference | 0.97 (0.91, 1.03) | 0.93 (0.87, 0.98)  | 0.93 (0.88, 0.99)  | 0.94 (0.88, 1.01)   |
| adjusted <sup>b</sup>              | Reference | 1.04 (0.98, 1.11) | 1.03 (0.97, 1.09)  | 1.03 (0.97, 1.10)  | 1.07 (1.00, 1.15)   |
| SWTD                               |           |                   |                    |                    |                     |
| crude                              | Reference | 1.10 (1.03, 1.18) | 1.12 (1.05, 1.20)  | 1.04 (0.97, 1.12)  | 1.00 (0.93, 1.08)   |
| adjusted <sup>b</sup>              | Reference | 1.16 (1.08, 1.25) | 1.21 (1.12, 1.30)  | 1.11 (1.03, 1.20)  | 1.05 (0.97, 1.15)   |
| DOES                               |           |                   |                    |                    |                     |
| crude                              | Reference | 1.20 (1.12, 1.28) | 1.23 (1.15, 1.32)  | 1.19 (1.11, 1.27)  | 1.19 (1.10, 1.28)   |
| adjusted <sup>b</sup>              | Reference | 1.31 (1.22, 1.41) | 1.33 (1.24, 1.43)  | 1.28 (1.18, 1.37)  | 1.36 (1.25, 1.47)   |
| SHY                                |           |                   |                    |                    |                     |
| crude                              | Reference | 1.15 (1.09, 1.21) | 1.09 (1.04, 1.16)  | 1.06 (1.00, 1.12)  | 1.02 (0.96, 1.09)   |
| adjusted <sup>b</sup>              | Reference | 1.11 (1.05, 1.18) | 1.11 (1.05, 1.18)  | 1.08 (1.01, 1.15)  | 0.94 (0.88, 1.01)   |
| Shorter sleep duration             |           |                   |                    |                    |                     |
| crude                              | Reference | 1.33 (1.27, 1.40) | 1.33 (1.27, 1.40)  | 1.17 (1.12, 1.23)  | 1.51 (1.43, 1.60)   |
| adjusted <sup>b</sup>              | Reference | 1.24 (1.17, 1.31) | 1.26 (1.19, 1.34)  | 1.14 (1.08, 1.21)  | 1.37 (1.29, 1.47)   |
| Longer sleep latency               |           |                   |                    |                    |                     |
| crude                              | Reference | 1.19 (1.08, 1.32) | 1.09 (0.98, 1.21)  | 1.08 (0.97, 1.20)  | 1.25 (1.11, 1.41)   |
| adjusted <sup>b</sup>              | Reference | 1.22 (1.09, 1.36) | 1.11 (0.99, 1.23)  | 1.09 (0.97, 1.22)  | 1.33 (1.16, 1.51)   |

Abbreviations: OR, odd ratio; CI, confidence interval; SWTD, sleep-wake transition disorders; DIMS, disorders of initiating and maintaining sleep; DOES, disorders of excessive somnolence; DA, disorders of arousal; SHY, sleep hyperhidrosis; SBD, sleep-breathing disorders; ALAN, artificial light at night; Q1, quintile 1; Q2, quintile 2; Q3, quintile 3; Q4, quintile 4; Q5, quintile 5.

Median: Q1, 8.5 nW/cm<sup>2</sup>/sr; Q2, 19.1 nW/cm<sup>2</sup>/sr; Q3, 25.9 nW/cm<sup>2</sup>/sr; Q4, 32.4 nW/cm<sup>2</sup>/sr; Q5, 47.7 nW/cm<sup>2</sup>/sr.

<sup>a</sup> Scores were calculated as *t* scores.

<sup>b</sup> Adjusted for children's age, children's sex, parental education, annual household income, district-level gross domestic product, and district-level population density, passive smoking, and breastfeeding.

**eTable 4. Associations Between Quintiles of Outdoor ALAN With Sleep Disorder Score and Odds of Sleep Disorder in Children Excluding Children With Allergic Rhinitis (n = 175 539)**

|                                    | Q1        | Q2                | Q3                 | Q4                  | Q5                  |
|------------------------------------|-----------|-------------------|--------------------|---------------------|---------------------|
| <b>β (95%CI) for outdoor ALAN</b>  |           |                   |                    |                     |                     |
| total sleep score <sup>a</sup>     |           |                   |                    |                     |                     |
| crude                              | Reference | 0.76 (0.61, 0.90) | 0.72 (0.57, 0.87)  | 0.53 (0.37, 0.68)   | 0.56 (0.39, 0.72)   |
| adjusted <sup>b</sup>              | Reference | 0.77 (0.61, 0.92) | 0.74 (0.58, 0.90)  | 0.50 (0.34, 0.67)   | 0.52 (0.34, 0.70)   |
| DIMS score <sup>a</sup>            |           |                   |                    |                     |                     |
| crude                              | Reference | 0.90 (0.76, 1.05) | 0.80 (0.65, 0.95)  | 0.78 (0.63, 0.93)   | 0.90 (0.73, 1.06)   |
| adjusted <sup>b</sup>              | Reference | 0.86 (0.71, 1.02) | 0.70 (0.54, 0.85)  | 0.67 (0.50, 0.83)   | 0.87 (0.69, 1.05)   |
| SBD score <sup>a</sup>             |           |                   |                    |                     |                     |
| crude                              | Reference | 0.41 (0.27, 0.55) | 0.63 (0.49, 0.77)  | 0.51 (0.37, 0.66)   | 0.58 (0.43, 0.74)   |
| adjusted <sup>b</sup>              | Reference | 0.32 (0.17, 0.46) | 0.51 (0.36, 0.65)  | 0.34 (0.18, 0.49)   | 0.28 (0.11, 0.45)   |
| DA score <sup>a</sup>              |           |                   |                    |                     |                     |
| crude                              | Reference | 0.15 (0.00, 0.30) | 0.04 (−0.11, 0.19) | −0.10 (−0.25, 0.06) | −0.10 (−0.26, 0.07) |
| adjusted <sup>b</sup>              | Reference | 0.29 (0.13, 0.45) | 0.24 (0.09, 0.40)  | 0.09 (−0.07, 0.26)  | 0.12 (−0.06, 0.30)  |
| SWTD score <sup>a</sup>            |           |                   |                    |                     |                     |
| crude                              | Reference | 0.44 (0.29, 0.59) | 0.32 (0.17, 0.47)  | 0.04 (−0.11, 0.19)  | 0.09 (−0.08, 0.26)  |
| adjusted <sup>b</sup>              | Reference | 0.38 (0.23, 0.54) | 0.35 (0.19, 0.51)  | 0.07 (−0.10, 0.23)  | −0.03 (−0.22, 0.15) |
| DOES score <sup>a</sup>            |           |                   |                    |                     |                     |
| crude                              | Reference | 0.44 (0.29, 0.59) | 0.59 (0.44, 0.74)  | 0.52 (0.36, 0.67)   | 0.39 (0.22, 0.55)   |
| adjusted <sup>b</sup>              | Reference | 0.67 (0.51, 0.82) | 0.72 (0.57, 0.88)  | 0.57 (0.41, 0.73)   | 0.68 (0.50, 0.86)   |
| SHY score <sup>a</sup>             |           |                   |                    |                     |                     |
| crude                              | Reference | 0.55 (0.41, 0.70) | 0.43 (0.28, 0.57)  | 0.17 (0.01, 0.32)   | 0.24 (0.07, 0.40)   |
| adjusted <sup>b</sup>              | Reference | 0.37 (0.22, 0.52) | 0.38 (0.23, 0.53)  | 0.16 (0.00, 0.32)   | −0.07 (−0.24, 0.11) |
| <b>OR (95%CI) for outdoor ALAN</b> |           |                   |                    |                     |                     |
| Sleep disorder                     |           |                   |                    |                     |                     |
| crude                              | Reference | 1.21 (1.11, 1.32) | 1.24 (1.14, 1.35)  | 1.12 (1.03, 1.23)   | 1.08 (0.98, 1.19)   |
| adjusted <sup>b</sup>              | Reference | 1.32 (1.21, 1.45) | 1.39 (1.27, 1.52)  | 1.24 (1.13, 1.37)   | 1.23 (1.10, 1.37)   |
| DIMS                               |           |                   |                    |                     |                     |
| crude                              | Reference | 1.23 (1.14, 1.32) | 1.25 (1.16, 1.35)  | 1.20 (1.12, 1.30)   | 1.22 (1.13, 1.33)   |
| adjusted <sup>b</sup>              | Reference | 1.27 (1.17, 1.37) | 1.29 (1.20, 1.39)  | 1.23 (1.14, 1.33)   | 1.31 (1.19, 1.44)   |
| SBD                                |           |                   |                    |                     |                     |
| crude                              | Reference | 1.14 (1.05, 1.24) | 1.22 (1.13, 1.32)  | 1.19 (1.10, 1.29)   | 1.17 (1.08, 1.28)   |
| adjusted <sup>b</sup>              | Reference | 1.16 (1.06, 1.26) | 1.24 (1.14, 1.35)  | 1.18 (1.08, 1.29)   | 1.14 (1.04, 1.25)   |
| DA                                 |           |                   |                    |                     |                     |
| crude                              | Reference | 0.96 (0.90, 1.03) | 0.92 (0.87, 0.99)  | 0.91 (0.85, 0.97)   | 0.93 (0.87, 1.00)   |
| adjusted <sup>b</sup>              | Reference | 1.04 (0.97, 1.11) | 1.03 (0.97, 1.11)  | 1.02 (0.95, 1.09)   | 1.07 (0.99, 1.16)   |
| SWTD                               |           |                   |                    |                     |                     |
| crude                              | Reference | 1.13 (1.05, 1.22) | 1.11 (1.03, 1.20)  | 1.02 (0.94, 1.10)   | 1.00 (0.91, 1.08)   |
| adjusted <sup>b</sup>              | Reference | 1.19 (1.10, 1.29) | 1.20 (1.11, 1.31)  | 1.09 (1.00, 1.19)   | 1.06 (0.96, 1.16)   |
| DOES                               |           |                   |                    |                     |                     |
| crude                              | Reference | 1.17 (1.09, 1.26) | 1.21 (1.12, 1.30)  | 1.17 (1.08, 1.26)   | 1.16 (1.07, 1.26)   |
| adjusted <sup>b</sup>              | Reference | 1.30 (1.20, 1.40) | 1.32 (1.22, 1.43)  | 1.27 (1.17, 1.37)   | 1.36 (1.24, 1.49)   |
| SHY                                |           |                   |                    |                     |                     |
| crude                              | Reference | 1.13 (1.06, 1.20) | 1.04 (0.98, 1.10)  | 1.00 (0.94, 1.06)   | 1.01 (0.94, 1.08)   |
| adjusted <sup>b</sup>              | Reference | 1.08 (1.01, 1.15) | 1.06 (0.99, 1.13)  | 1.03 (0.96, 1.10)   | 0.92 (0.85, 0.99)   |
| Shorter sleep duration             |           |                   |                    |                     |                     |
| crude                              | Reference | 1.34 (1.27, 1.41) | 1.31 (1.25, 1.38)  | 1.18 (1.12, 1.25)   | 1.51 (1.43, 1.61)   |
| adjusted <sup>b</sup>              | Reference | 1.23 (1.16, 1.30) | 1.23 (1.16, 1.31)  | 1.14 (1.07, 1.21)   | 1.38 (1.28, 1.48)   |
| Longer sleep latency               |           |                   |                    |                     |                     |
| crude                              | Reference | 1.19 (1.06, 1.33) | 1.07 (0.96, 1.20)  | 1.07 (0.95, 1.20)   | 1.26 (1.11, 1.43)   |
| adjusted <sup>b</sup>              | Reference | 1.21 (1.08, 1.36) | 1.09 (0.97, 1.24)  | 1.09 (0.96, 1.23)   | 1.35 (1.18, 1.56)   |

Abbreviations: OR, odd ratio; CI, confidence interval; SWTD, sleep-wake transition disorders; DIMS, disorders of initiating and maintaining sleep; DOES, disorders of excessive somnolence; DA, disorders of arousal; SHY, sleep hyperhidrosis; SBD, sleep-breathing disorders; ALAN, artificial light at night; Q1, quintile 1; Q2, quintile 2; Q3, quintile 3; Q4, quintile 4; Q5, quintile 5.

Median: Q1, 8.5 nW/cm<sup>2</sup>/sr; Q2, 19.1 nW/cm<sup>2</sup>/sr; Q3, 25.9 nW/cm<sup>2</sup>/sr; Q4, 32.4 nW/cm<sup>2</sup>/sr; Q5, 47.7 nW/cm<sup>2</sup>/sr.

<sup>a</sup> Scores were calculated as *t* scores.

<sup>b</sup> Adjusted for children's age, children's sex, parental education, annual household income, district-level gross domestic product, and district-level population density.

**eTable 5. Associations Between Quintiles of Outdoor ALAN With Sleep Disorder Score and Odds of Sleep Disorder in Children Excluding Children With Asthma (n = 185 260)**

|                                    | Q1        | Q2                 | Q3                 | Q4                  | Q5                  |
|------------------------------------|-----------|--------------------|--------------------|---------------------|---------------------|
| <b>β (95%CI) for outdoor ALAN</b>  |           |                    |                    |                     |                     |
| total sleep score <sup>a</sup>     |           |                    |                    |                     |                     |
| crude                              | Reference | 0.79 (0.65, 0.94)  | 0.80 (0.66, 0.94)  | 0.66 (0.51, 0.81)   | 0.60 (0.44, 0.76)   |
| adjusted <sup>b</sup>              | Reference | 0.77 (0.62, 0.92)  | 0.75 (0.60, 0.91)  | 0.55 (0.39, 0.71)   | 0.46 (0.28, 0.63)   |
| DIMS score <sup>a</sup>            |           |                    |                    |                     |                     |
| crude                              | Reference | 0.92 (0.77, 1.06)  | 0.82 (0.68, 0.96)  | 0.86 (0.71, 1.00)   | 0.90 (0.74, 1.06)   |
| adjusted <sup>b</sup>              | Reference | 0.88 (0.73, 1.03)  | 0.70 (0.55, 0.85)  | 0.71 (0.55, 0.87)   | 0.82 (0.64, 1.00)   |
| SBD score <sup>a</sup>             |           |                    |                    |                     |                     |
| crude                              | Reference | 0.53 (0.39, 0.67)  | 0.77 (0.63, 0.91)  | 0.75 (0.60, 0.89)   | 0.73 (0.57, 0.89)   |
| adjusted <sup>b</sup>              | Reference | 0.38 (0.23, 0.53)  | 0.55 (0.40, 0.70)  | 0.42 (0.27, 0.58)   | 0.27 (0.09, 0.44)   |
| DA score <sup>a</sup>              |           |                    |                    |                     |                     |
| crude                              | Reference | 0.11 (-0.04, 0.26) | 0.02 (-0.12, 0.17) | -0.03 (-0.18, 0.12) | -0.11 (-0.27, 0.05) |
| adjusted <sup>b</sup>              | Reference | 0.20 (0.05, 0.35)  | 0.17 (0.02, 0.32)  | 0.10 (-0.06, 0.26)  | 0.04 (-0.14, 0.21)  |
| SWTD score <sup>a</sup>            |           |                    |                    |                     |                     |
| crude                              | Reference | 0.46 (0.32, 0.61)  | 0.37 (0.23, 0.52)  | 0.16 (0.01, 0.31)   | 0.11 (-0.05, 0.27)  |
| adjusted <sup>b</sup>              | Reference | 0.38 (0.23, 0.53)  | 0.36 (0.21, 0.52)  | 0.12 (-0.03, 0.28)  | -0.08 (-0.26, 0.10) |
| DOES score <sup>a</sup>            |           |                    |                    |                     |                     |
| crude                              | Reference | 0.45 (0.31, 0.60)  | 0.64 (0.49, 0.79)  | 0.51 (0.36, 0.66)   | 0.40 (0.24, 0.57)   |
| adjusted <sup>b</sup>              | Reference | 0.67 (0.51, 0.82)  | 0.73 (0.58, 0.88)  | 0.52 (0.36, 0.68)   | 0.61 (0.44, 0.79)   |
| SHY score <sup>a</sup>             |           |                    |                    |                     |                     |
| crude                              | Reference | 0.60 (0.45, 0.74)  | 0.53 (0.39, 0.67)  | 0.31 (0.17, 0.46)   | 0.28 (0.12, 0.44)   |
| adjusted <sup>b</sup>              | Reference | 0.38 (0.23, 0.53)  | 0.43 (0.28, 0.58)  | 0.21 (0.06, 0.36)   | -0.08 (-0.26, 0.09) |
|                                    |           |                    |                    |                     |                     |
| <b>OR (95%CI) for outdoor ALAN</b> |           |                    |                    |                     |                     |
| Sleep disorder                     |           |                    |                    |                     |                     |
| crude                              | Reference | 1.21 (1.11, 1.31)  | 1.27 (1.17, 1.38)  | 1.18 (1.09, 1.29)   | 1.10 (1.00, 1.21)   |
| adjusted <sup>b</sup>              | Reference | 1.31 (1.20, 1.43)  | 1.40 (1.28, 1.53)  | 1.28 (1.17, 1.41)   | 1.22 (1.10, 1.35)   |
| DIMS                               |           |                    |                    |                     |                     |
| crude                              | Reference | 1.24 (1.16, 1.33)  | 1.25 (1.17, 1.34)  | 1.23 (1.14, 1.32)   | 1.23 (1.13, 1.33)   |
| adjusted <sup>b</sup>              | Reference | 1.28 (1.19, 1.38)  | 1.29 (1.20, 1.39)  | 1.25 (1.16, 1.35)   | 1.29 (1.18, 1.41)   |
| SBD                                |           |                    |                    |                     |                     |
| crude                              | Reference | 1.16 (1.08, 1.25)  | 1.26 (1.18, 1.36)  | 1.24 (1.15, 1.33)   | 1.22 (1.13, 1.32)   |
| adjusted <sup>b</sup>              | Reference | 1.16 (1.07, 1.25)  | 1.24 (1.15, 1.34)  | 1.17 (1.08, 1.26)   | 1.12 (1.03, 1.23)   |
| DA                                 |           |                    |                    |                     |                     |
| crude                              | Reference | 0.94 (0.88, 1.00)  | 0.92 (0.86, 0.98)  | 0.92 (0.86, 0.98)   | 0.92 (0.86, 0.99)   |
| adjusted <sup>b</sup>              | Reference | 1.00 (0.94, 1.07)  | 1.00 (0.94, 1.07)  | 1.00 (0.94, 1.08)   | 1.04 (0.96, 1.12)   |
| SWTD                               |           |                    |                    |                     |                     |
| crude                              | Reference | 1.09 (1.01, 1.17)  | 1.11 (1.03, 1.20)  | 1.03 (0.96, 1.11)   | 0.96 (0.88, 1.04)   |
| adjusted <sup>b</sup>              | Reference | 1.15 (1.06, 1.24)  | 1.19 (1.10, 1.29)  | 1.09 (1.01, 1.19)   | 1.00 (0.92, 1.10)   |
| DOES                               |           |                    |                    |                     |                     |
| crude                              | Reference | 1.19 (1.11, 1.28)  | 1.22 (1.13, 1.31)  | 1.16 (1.08, 1.25)   | 1.16 (1.07, 1.26)   |
| adjusted <sup>b</sup>              | Reference | 1.31 (1.21, 1.41)  | 1.32 (1.22, 1.42)  | 1.25 (1.15, 1.35)   | 1.33 (1.21, 1.45)   |
| SHY                                |           |                    |                    |                     |                     |
| crude                              | Reference | 1.14 (1.08, 1.21)  | 1.08 (1.02, 1.15)  | 1.06 (0.99, 1.12)   | 1.02 (0.95, 1.09)   |
| adjusted <sup>b</sup>              | Reference | 1.09 (1.03, 1.16)  | 1.09 (1.03, 1.16)  | 1.06 (1.00, 1.14)   | 0.92 (0.85, 0.99)   |
| Shorter sleep duration             |           |                    |                    |                     |                     |
| crude                              | Reference | 1.32 (1.25, 1.38)  | 1.30 (1.24, 1.37)  | 1.17 (1.11, 1.23)   | 1.49 (1.41, 1.58)   |
| adjusted <sup>b</sup>              | Reference | 1.24 (1.17, 1.31)  | 1.25 (1.17, 1.32)  | 1.14 (1.08, 1.21)   | 1.36 (1.27, 1.46)   |
| Longer sleep latency               |           |                    |                    |                     |                     |
| crude                              | Reference | 1.21 (1.09, 1.35)  | 1.11 (0.99, 1.24)  | 1.10 (0.98, 1.23)   | 1.27 (1.12, 1.44)   |
| adjusted <sup>b</sup>              | Reference | 1.25 (1.11, 1.40)  | 1.14 (1.01, 1.28)  | 1.11 (0.99, 1.25)   | 1.37 (1.20, 1.58)   |

Abbreviations: OR, odd ratio; CI, confidence interval; SWTD, sleep-wake transition disorders; DIMS, disorders of initiating and maintaining sleep; DOES, disorders of excessive somnolence; DA, disorders of arousal; SHY, sleep hyperhidrosis; SBD, sleep-breathing disorders; ALAN, artificial light at night; Q1, quintile 1; Q2, quintile 2; Q3, quintile 3; Q4, quintile 4; Q5, quintile 5.

Median: Q1, 8.5 nW/cm<sup>2</sup>/sr; Q2, 19.1 nW/cm<sup>2</sup>/sr; Q3, 25.9 nW/cm<sup>2</sup>/sr; Q4, 32.4 nW/cm<sup>2</sup>/sr; Q5, 47.7 nW/cm<sup>2</sup>/sr.

<sup>a</sup> Scores were calculated as *t* scores..

<sup>b</sup> Adjusted for children's age, children's gender, parental education, annual household income, district-level gross domestic product, and district-level population density.sex

**eFigure 1. Flowchart of Study Design and Participant Selection**

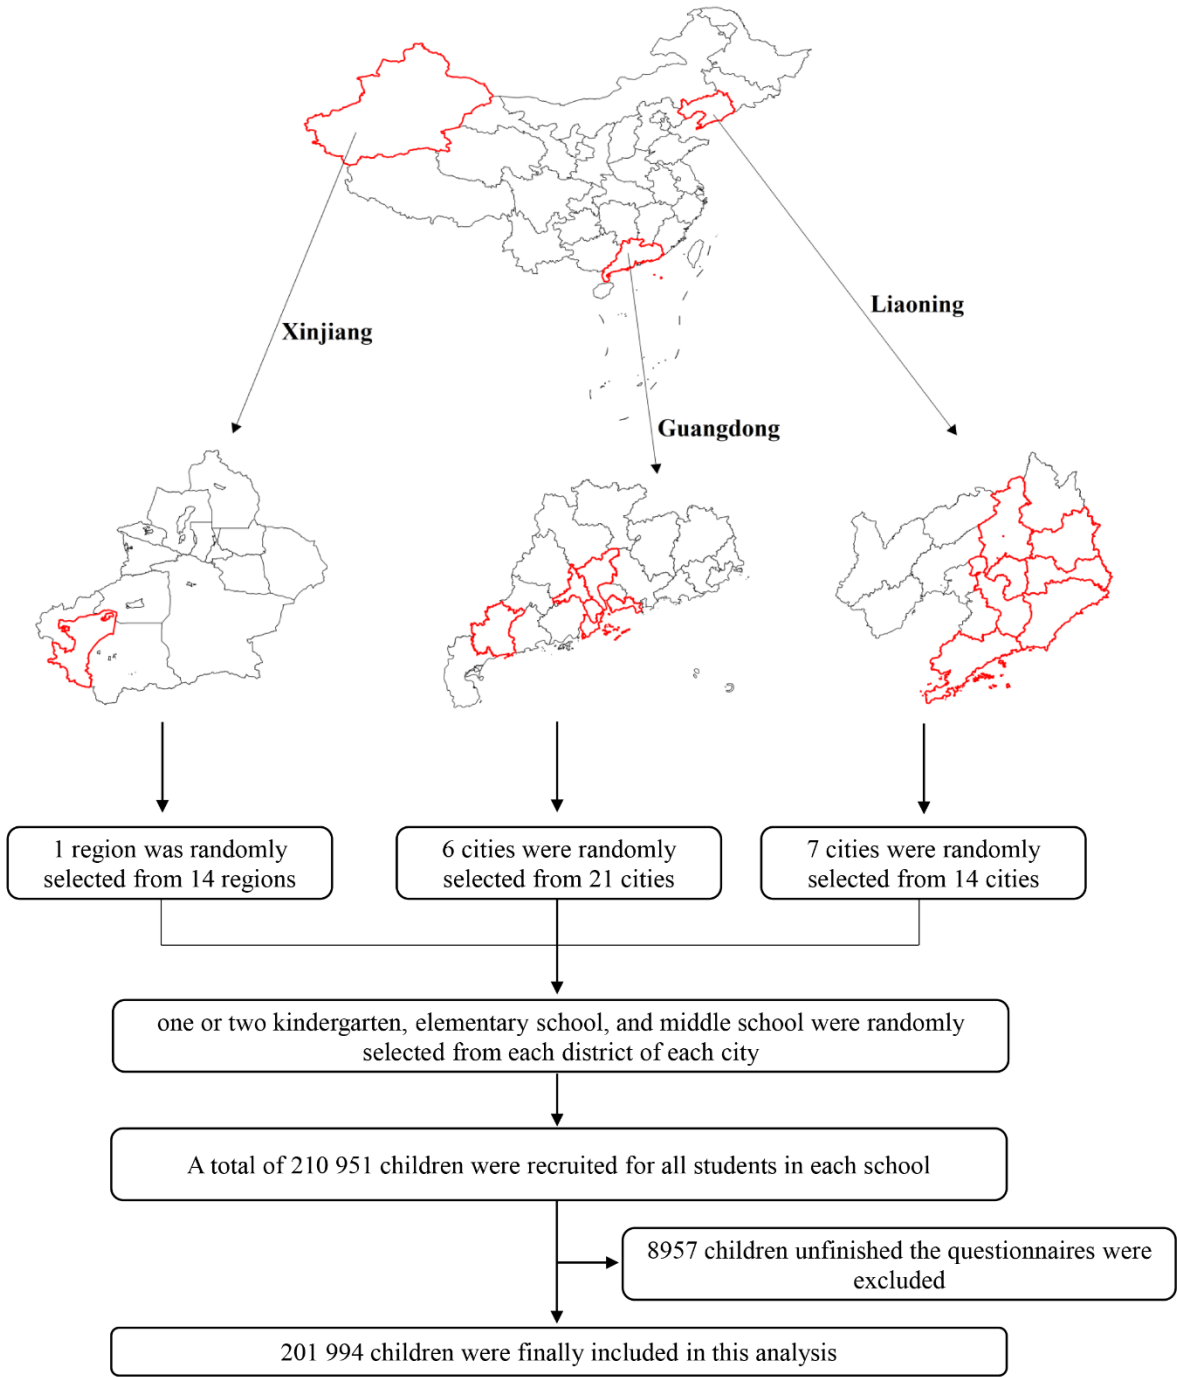

**eFigure 2. Directed Acyclic Graph for the Association Between Outdoor Artificial Light at Night and Sleep Disorder Symptoms, Showing All Potential Covariates**

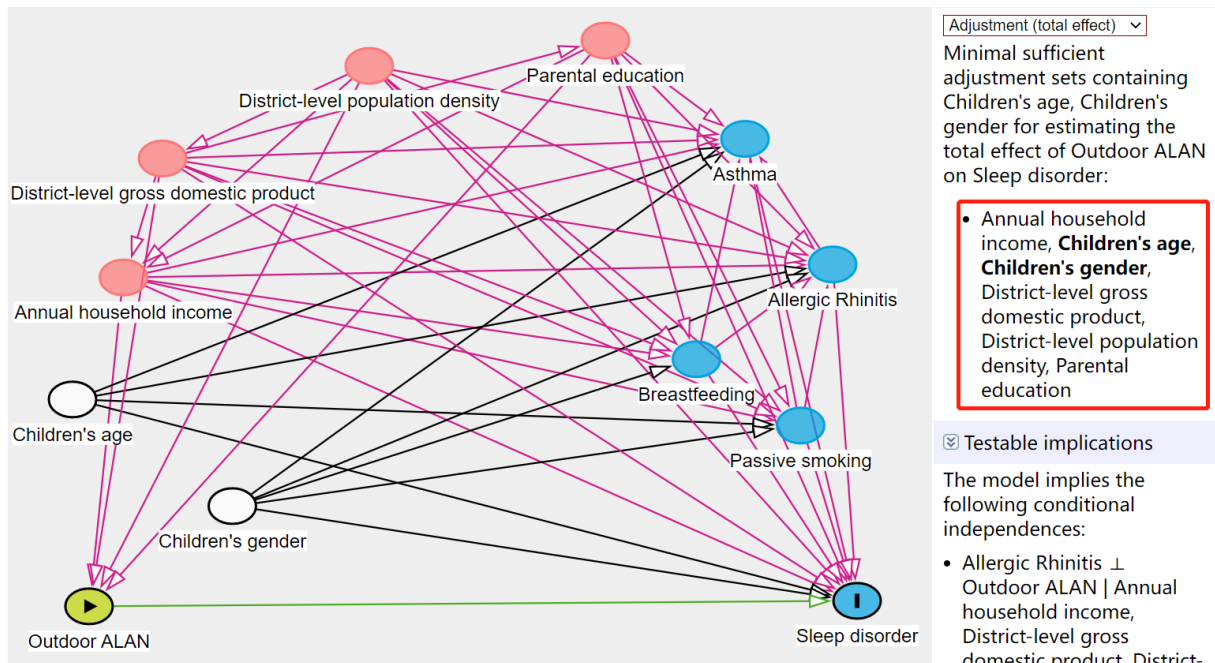

Supplement: jamanetwopen-e2213247-s001.pdf [file jamanetwopen-e2213247-s001.pdf]
